# Supplementary material for: SAA1 Has Potential as a Prognostic Biomarker Correlated with Cell Proliferation, Migration, and an Indicator for Immune Infiltration of Tumor Microenvironment in Clear Cell Renal Cell Carcinoma
Source: MDPI journal article supplement (doi:10.3390/ijms24087505), 2023-04-19
Supplement: s1 [file s1]

**Supplementary Table S2. Enriched gene sets.**

| MSigDB collection       | Gene set name                                                                       | NES   | NOM<br>p-val | FDR q-<br>val |
|-------------------------|-------------------------------------------------------------------------------------|-------|--------------|---------------|
| h.all.v7.0.symbols.gmt  |                                                                                     |       |              |               |
| SAA1 high expression    | HALLMARK_APOPTOSIS                                                                  | 1.784 | 0.0096       | 0.0474        |
| vs                      | HALLMARK_GLYCOLYSIS                                                                 | 1.732 | 0.0178       | 0.0336        |
| SAA1 low expression     | HALLMARK_COMPLEMENT                                                                 | 1.727 | 0.0041       | 0.0231        |
|                         | HALLMARK_P53_PATHWAY                                                                | 1.660 | 0.0098       | 0.0219        |
|                         | HALLMARK_IL6_JAK_STAT3_SIGNALING                                                    | 1.623 | 0.0298       | 0.0232        |
|                         | HALLMARK_COAGULATION                                                                | 1.619 | 0.0080       | 0.0204        |
|                         | HALLMARK_ESTROGEN_RESPONSE_LATE                                                     | 1.607 | 0.0117       | 0.0190        |
|                         | HALLMARK_ALLOGRAFT_REJECTION                                                        | 1.591 | 0.0451       | 0.0187        |
|                         | HALLMARK_INFLAMMATORY_RESPONSE                                                      | 1.546 | 0.0490       | 0.0213        |
|                         | HALLMARK_KRAS_SIGNALING_UP                                                          | 1.506 | 0.0303       | 0.0221        |
|                         | HALLMARK_APICAL_JUNCTION                                                            | 1.490 | 0.0459       | 0.0205        |
| c7.all.v7.0.symbols.gmt |                                                                                     |       |              |               |
| SAA1 high expression    | GSE15930_STIM_VS_STIM_AND_IFNAB_72H_CD8_T_CELL_DN                                   | 1.828 | 0.0042       | 0.0248        |
| vs                      | GSE17721_0.5H_VS_4H_LPS_BMDC_DN                                                     | 1.828 | 0            | 0.0244        |
| SAA1 low expression     | GSE17974_0H_VS_72H_IN_VITRO_ACT_CD4_TCELL_DN                                        | 1.826 | 0.0186       | 0.0241        |
|                         | GSE17721_CTRL_VS_PAM3CSK4_6H_BMDC_UP                                                | 1.825 | 0            | 0.0240        |
|                         | GSE36826_WT_VS_IL1R_KO_SKIN_STAPH_AUREUS_INF_UP                                     | 1.824 | 0.0166       | 0.0237        |
|                         | GSE43863_TH1_VS_LY6C_INT_CXCR5POS_EFFECTOR_CD4_TCELL_UP                             | 1.824 | 0.0125       | 0.0233        |
|                         | GSE32164_ALTERNATIVELY_ACT_M2_VS_CMYC_INHIBITED_MACROPHAGE_DN                       | 1.824 | 0.0041       | 0.0230        |
|                         | GSE22886_NAIVE_BCELL_VS_BM_PLASMA_CELL_DN                                           | 1.819 | 0.0000       | 0.0236        |
|                         | GSE37533_UNTREATED_VS_PIOGLIZATONE_TREATED_CD4_TCELL_PPARG1_AND_FOXP3_TRANSDUCED_UP | 1.819 | 0.0020       | 0.0233        |
|                         | GSE37532_TREG_VS_TCONV_CD4_TCELL_FROM_LN_UP                                         | 1.818 | 0.0084       | 0.0231        |

NES: normalized enrichment score; NOM: nominal p-value; FDR: false discovery rate. Gene sets with NOM p-value less than 0.05 and FDR q-value less than 0.05 were considered as statistical significance. Only several leading sets enriched in SAA1 high expression both in HALLMARK and C7 were listed here due to the large number of enriched gene sets.
