# Supplementary material for: SAA1 Has Potential as a Prognostic Biomarker Correlated with Cell Proliferation, Migration, and an Indicator for Immune Infiltration of Tumor Microenvironment in Clear Cell Renal Cell Carcinoma
Source: MDPI journal article supplement (doi:10.3390/ijms24087505), 2023-04-19
Supplement: s1 [file s1]

**Supplementary Table S1.** Clinicopathological characteristics statistics of KIRC patients from TCGA.

| Clinical characteristics |                         | Total<br>(537) | %    |
|--------------------------|-------------------------|----------------|------|
| Age at diagnosis (y)     | young age ( $\leq 60$ ) | 266            | 49.5 |
|                          | old age ( $> 60$ )      | 271            | 50.5 |
| Gender                   | Male                    | 346            | 64.4 |
|                          | Female                  | 191            | 35.6 |
| Stage                    | I                       | 269            | 50.1 |
|                          | II                      | 57             | 10.6 |
|                          | III                     | 125            | 23.3 |
|                          | IV                      | 84             | 15.6 |
|                          | NA                      | 2              | 0.4  |
| T classification         | T1                      | 275            | 51.2 |
|                          | T2                      | 69             | 12.8 |
|                          | T3                      | 182            | 33.9 |
|                          | T4                      | 11             | 2.0  |
| M classification         | M0                      | 426            | 79.3 |
|                          | M1                      | 79             | 14.7 |
|                          | NA                      | 32             | 6.0  |
| N classification         | N0                      | 240            | 44.7 |
|                          | N1                      | 17             | 3.2  |
|                          | NA                      | 280            | 52.1 |
